# Supplementary material for: Increased Risk of Psoriasis due to combined effect of HLA-Cw6 and LCE3 risk alleles in Indian population
Source: PubMed Central journal article supplement (PMC4822143; doi:10.1038/srep24059), 2016-04-06

## Supplementary Information

### Increased Risk of Psoriasis due to combined effect of HLA-Cw6 and LCE3 risk alleles in Indian population

*Aditi Chandra<sup>1</sup>, Anirudhya Lahiri<sup>1</sup>, Swapan Senapati<sup>2</sup>, Baidehi Basu<sup>1</sup>, Saurabh Ghosh<sup>1</sup>,  
Indranil Mukhopadhyay<sup>1</sup>, Akhilesh Behra<sup>3</sup>, Somenath Sarkar<sup>4</sup>, Gobinda Chatterjee<sup>3</sup>,  
Raghunath Chatterjee<sup>1\*</sup>*

<sup>1</sup> Human Genetics Unit, Indian Statistical Institute, 203 B. T. Road, Kolkata, India 700108

<sup>2</sup> Consultant Dermatologist, Uttarpara, Hooghly India 712258

<sup>3</sup>Department of Dermatology, SSKM Hospital, Kolkata, India

<sup>4</sup>Department of Dermatology, School of Tropical medicine, Kolkata, India

\*Author for correspondence:

E-mail:- [rchatterjee@isical.ac.in](mailto:rchatterjee@isical.ac.in); Tel:- +91 33 2575 3243; Fax:- +91 33 2577 3049

## Supplementary Tables

**Table S1. Sample Summary**

| Sample       | Population    | Sample Size | Mean Age of Onset/Age (SD)     | Male/Female(%)   | Type1/Type2(%) |
|--------------|---------------|-------------|--------------------------------|------------------|----------------|
| Case         | Eastern India | 705         | 34.96 (15.68)<br>Range : 08-79 | 68/32            | 61.74/38.26    |
| Control      |               | 738         | 39.24 (14.72)<br>Range : 11-83 | 52.79/47.21      |                |
| <b>Total</b> |               | <b>1443</b> | <b>37.095</b>                  | <b>60.4/39.6</b> |                |

**Table S2. Association of HLA-Cw6 allele with TypeI and TypeII Psoriasis**

|                   | Psoriasis               |                        | Normal   |
|-------------------|-------------------------|------------------------|----------|
|                   | TypeI                   | TypeII                 |          |
| HLA-Cw6 Frequency | 0.534247                | 0.34211                | 0.148501 |
| P-Value           | $< 2.2 \times 10^{-16}$ | $1.38 \times 10^{-11}$ |          |
| 95% CI            | 5.01 - 8.71             | 2.15 - 4.13            |          |
| Odds Ratio        | 6.61                    | 2.98                   |          |

**Table S3. Characteristics of the SNPs and CNV studied here**

| SNP ID/CNV | Chromosome | Alleles | Nearest Gene | Position from Gene | HWE (P-values) |        |        |
|------------|------------|---------|--------------|--------------------|----------------|--------|--------|
|            |            |         |              |                    | Major/Minor    | All    | Case   |
| rs1886734  | 1          | C/A     | LCE3A        | 3' down (+4168)    | 0.8881         | 0.4981 | 0.443  |
| Deletion   | 1          | del/ins | LCE3C-3B     | 32.2kbp            | 0.0659         | 0.6017 | 0.064  |
| rs4112788  | 1          | G/A     | LCE3D        | 3' down (+584bp)   | 0.7246         | 0.5593 | 0.3329 |
| rs7516108  | 1          | C/T     | LCE3E        | 5' up (-2981bp)    | 0.3177         | 0.6526 | 0.0847 |

**Table S4. LCE3 SNPs showed similar association level even after adjusting for age and sex**

| SNP/CNV   | Nearest Gene | Genotypes               | Genotype Frequency    |                       | p-value                                 |
|-----------|--------------|-------------------------|-----------------------|-----------------------|-----------------------------------------|
|           |              |                         | Case                  | Control               |                                         |
| rs1886734 | LCE3A        | CC/CA/AA                | 0.43/0.46/0.11        | 0.40/0.46/0.15        | $1.04 \times 10^{-1}$                   |
| Deletion  | LCE3C-3B     | Del-Del/Del-Ins/Ins-Ins | <b>0.43/0.45/0.13</b> | <b>0.37/0.45/0.18</b> | <b><math>3.18 \times 10^{-2}</math></b> |
| rs4112788 | LCE3D        | GG/GA/AA                | 0.43/0.46/0.11        | 0.40/0.45/0.15        | $1.02 \times 10^{-1}$                   |
| rs7516108 | LCE3E        | CC/CT/TT                | 0.38/0.48/0.14        | 0.36/0.46/0.19        | $7.92 \times 10^{-2}$                   |

**Table S5. Linkage pattern (with  $r^2$  values) of LCE3 cluster**

| <b>r2: Total</b> | <b>DELETION</b> | <b>rs4112788</b> | <b>rs7516108</b> |
|------------------|-----------------|------------------|------------------|
| <b>rs1886734</b> | 0.806           | 0.971            | 0.610            |
| <b>DELETION</b>  | -               | 0.813            | 0.524            |
| <b>rs4112788</b> | -               | -                | 0.613            |

**Table S6: TypeI (Age of Onset<=40 years) showed higher LCE3 association**

| <b>SNP ID</b>    | <b>Control</b> | <b>TypeI (n=438)</b> |           |               |      |                 | <b>TypeII (n=268)</b> |           |               |        |
|------------------|----------------|----------------------|-----------|---------------|------|-----------------|-----------------------|-----------|---------------|--------|
|                  |                | <b>MAF</b>           | <b>OR</b> | <b>95% CI</b> |      | <b>p-value</b>  | <b>MAF</b>            | <b>OR</b> | <b>95% CI</b> |        |
| <b>rs1886734</b> | 0.37           | 0.33                 | 1.20      | 1.01-         | 1.43 | <b>0.03958</b>  | 0.36                  | 1.01      | 0.88-1.33     | 0.4605 |
| <b>Deletion</b>  | 0.41           | 0.34                 | 1.34      | 1.12-         | 1.60 | <b>0.001075</b> | 0.37                  | 1.15      | 0.94-1.41     | 0.1694 |
| <b>rs4112788</b> | 0.37           | 0.33                 | 1.21      | 1.02-         | 1.44 | <b>0.03229</b>  | 0.36                  | 1.07      | 0.87-1.31     | 0.5352 |
| <b>rs7516108</b> | 0.42           | 0.37                 | 1.21      | 1.01-         | 1.43 | <b>0.03392</b>  | 0.39                  | 1.11      | 0.90-1.36     | 0.3187 |

**Table S7: Association model of LCE3E SNP and LCE3C-3B Deletion**

|                          |                 | <b>Major(1)</b> | <b>Minor(2)</b> | <b>Case(11/12/22)</b> | <b>Control(11/12/22)</b> | <b>p-value</b>  |
|--------------------------|-----------------|-----------------|-----------------|-----------------------|--------------------------|-----------------|
| <b>rs7516108 (LCE3E)</b> | Additive        | C               | T               | 269/335/97            | 257/329/137              | 0.0329          |
|                          | <b>Dominant</b> |                 |                 | <b>604/97</b>         | <b>586/137</b>           | <b>0.00987</b>  |
|                          | Recessive       |                 |                 | 269/432               | 257/466                  | 0.2692          |
| <b>LCE3C-3B Deletion</b> | Additive        | Del             | Ins             | 300/313/89            | 270/329/133              | 0.0064          |
|                          | <b>Dominant</b> |                 |                 | <b>613/89</b>         | <b>599/133</b>           | <b>0.004069</b> |
|                          | Recessive       |                 |                 | 300/402               | 270/462                  | 0.0237          |

**Table S8: Association of SNPs after age and sex adjustment on stratified samples**

| <b>HLA-Cw6 Present</b> |             |                |                               |
|------------------------|-------------|----------------|-------------------------------|
| <b>SNP</b>             | <b>MAF</b>  |                | <b>Adjusted p-value</b>       |
|                        | <b>Case</b> | <b>Control</b> |                               |
| <b>LCE3A</b>           | <b>0.30</b> | <b>0.46</b>    | <b>2.85 x 10<sup>-4</sup></b> |
| <b>DELETION</b>        | <b>0.32</b> | <b>0.49</b>    | <b>2.85 x 10<sup>-4</sup></b> |
| <b>LCE3D</b>           | <b>0.30</b> | <b>0.46</b>    | <b>2.85 x 10<sup>-4</sup></b> |
| <b>LCE3E</b>           | <b>0.36</b> | <b>0.48</b>    | <b>4.20 x 10<sup>-3</sup></b> |
| <b>HLA-Cw6 Absent</b>  |             |                |                               |
| <b>SNP</b>             | <b>MAF</b>  |                | <b>Adjusted p-value</b>       |
|                        | <b>Case</b> | <b>Control</b> |                               |
| LCE3A                  | 0.37        | 0.36           | 8.41 x 10 <sup>-1</sup>       |
| DELETION               | 0.38        | 0.39           | 8.41 x 10 <sup>-1</sup>       |
| LCE3D                  | 0.37        | 0.35           | 8.41 x 10 <sup>-1</sup>       |
| LCE3E                  | 0.4         | 0.4            | 8.41 x 10 <sup>-1</sup>       |

## Supplementary Figures

**FigureS1. LD pattern (D') of LCE3 cluster.** Total LCE3 cluster showed strong linkage in Indian population.

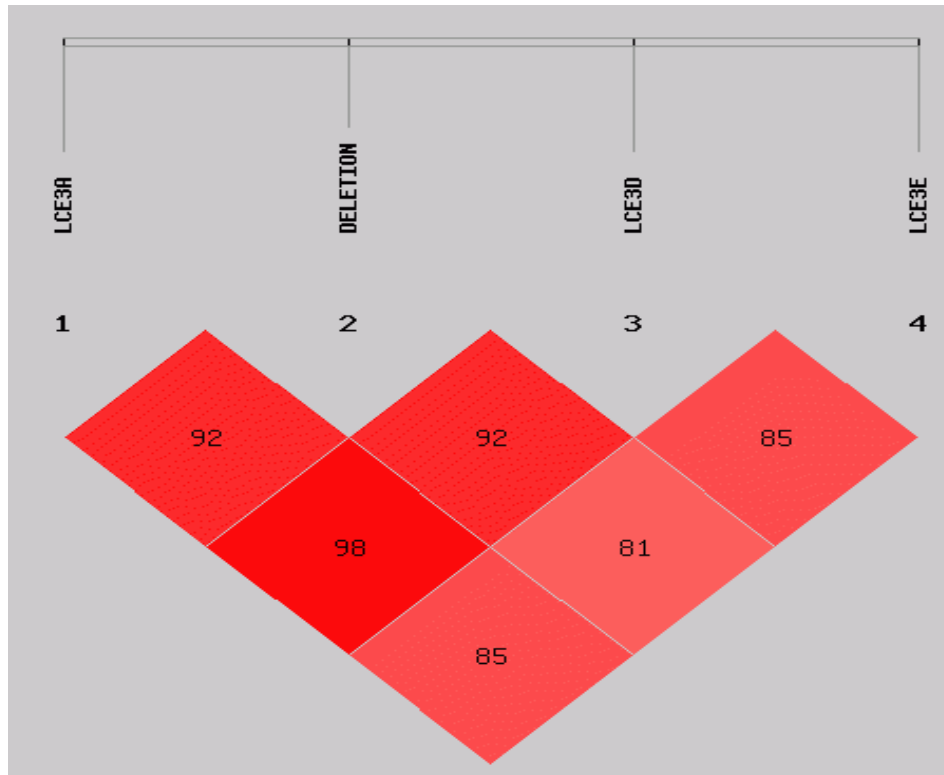

**FigureS1b.** Variation in expression pattern from diseased tissue with respect to genotypes of LCE3E gene.

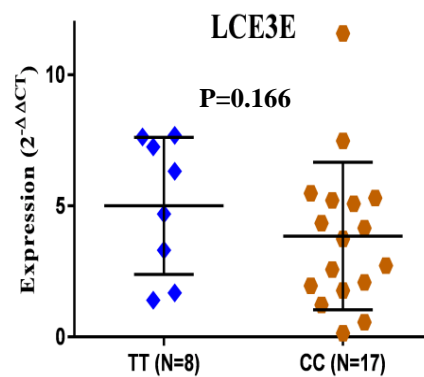

**FigureS1c.** Expression pattern of LCE3D and LCE3E genes with respect to genotype and HLA-Cw6 status.

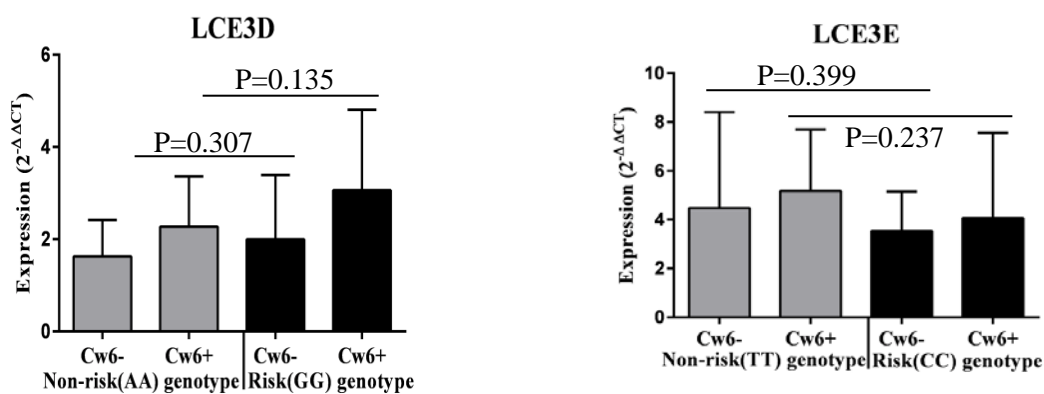

Supplement: srep24059-s1.pdf [file srep24059-s1.pdf]
